# Supplementary material for: Large adipose tissue generation in a mussel-inspired bioreactor of elastic–mimetic cryogel and platelets
Source: PubMed Central journal article supplement — J Tissue Eng. 2018 Nov 14;9:2041731418808633. doi: 10.1177/2041731418808633 (PMC6259050; doi:10.1177/2041731418808633), 2018-11-14
Supplement: supporting_information_(1).pdf [file supporting_information_%281%29.pdf]

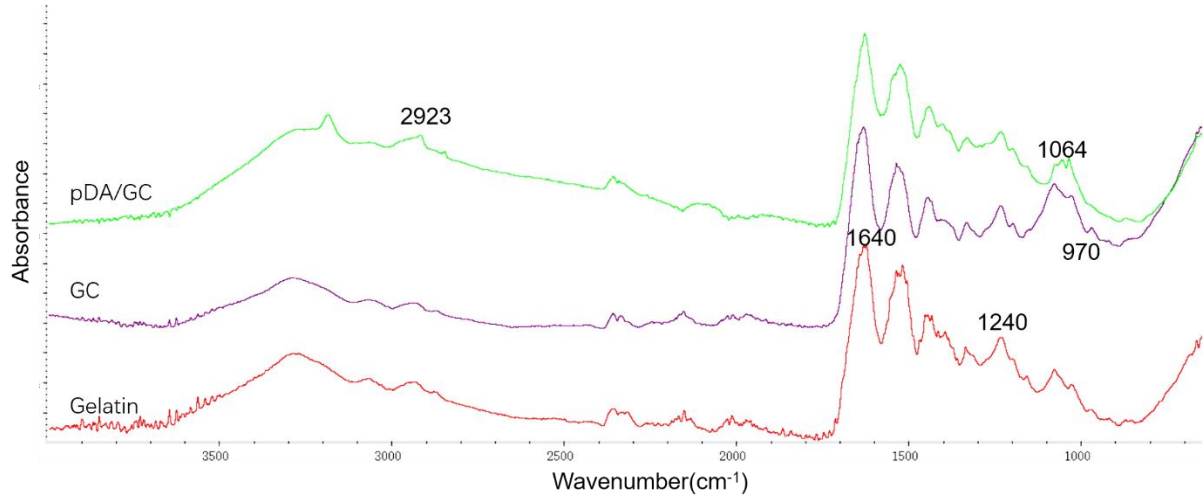

Figure. S1 FTIR spectra of pristine gelatin, gelatin-MA, and pDA/GC

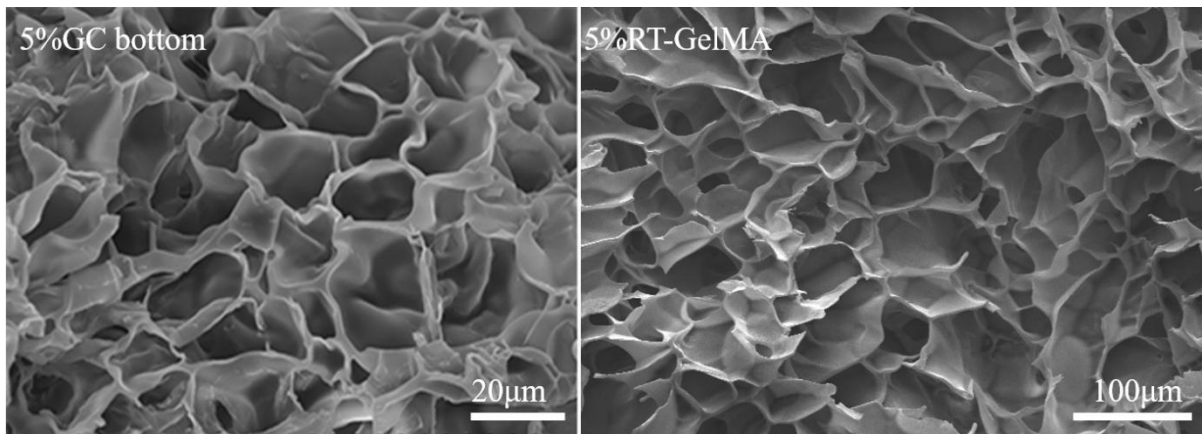

Figure. S2 Representative SEM porous structure of bottom layer of 5% GC and RT-GelMA.

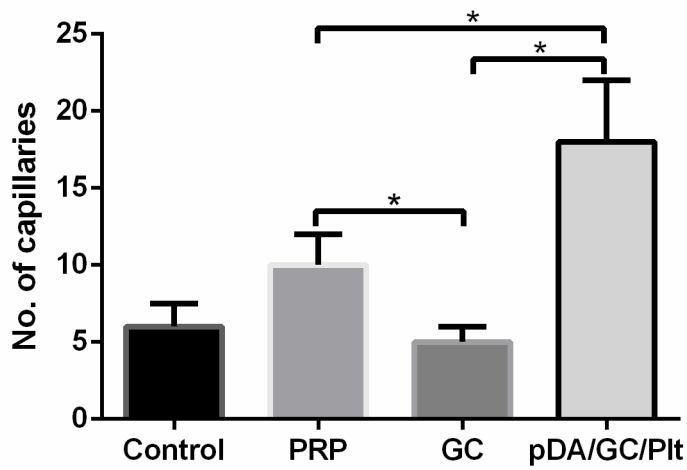

Figure.S3 Vessel density was evaluated after 12 weeks (\*:  $p < 0.05$ )
